# Supplementary material for: Direct detection of trace level illicit drugs in human body fluids by probe electrospray ionization mass spectrometry (PESI-MS)
Source: Royal Society of Chemistry journal article supplement (doi:10.1039/c3ay41117f), 2013-01-01
Supplement: c3ay41117f.pdf [file c3ay41117f.pdf]

## Supporting Information for

# **Direct detection of trace level illicit drugs in human body fluids by probe electrospray ionization mass spectrometry (PESI-MS)**

Subhrakanti Saha, Mridul Kanti Mandal and Kenzo Hiraoka\*

Clean Energy Research Center

University of Yamanashi, 4-3-11 Takeda, Kofu, Yamanashi, 400-8511, Japan

\*Corresponding Author:

Prof. Kenzo Hiraoka

Clean Energy Research Center

University of Yamanashi

4-3-11 Takeda, Kofu, Yamanashi

Japan – 400-8511

Tel: +81-55-220-8572; Fax: +81-55-220-8709

E-mail: [hiraoka@yamanashi.ac.jp](mailto:hiraoka@yamanashi.ac.jp)

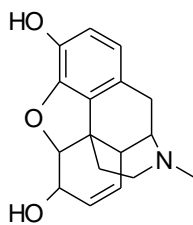

Morphine  
Exact Mass: 285.1359

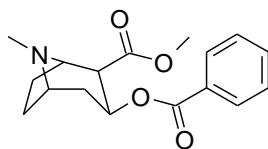

Cocaine  
Exact Mass: 303.1465

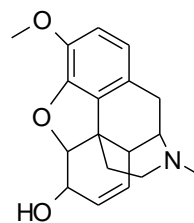

Codeine  
Exact Mass: 299.1516

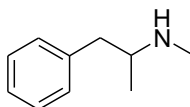

Methamphetamine  
Exact Mass: 149.1199

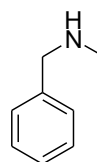

N-Benzylmethylamine  
Exact Mass: 121.0886

Figure S1. Structure and exact molecular mass of the chemicals used.

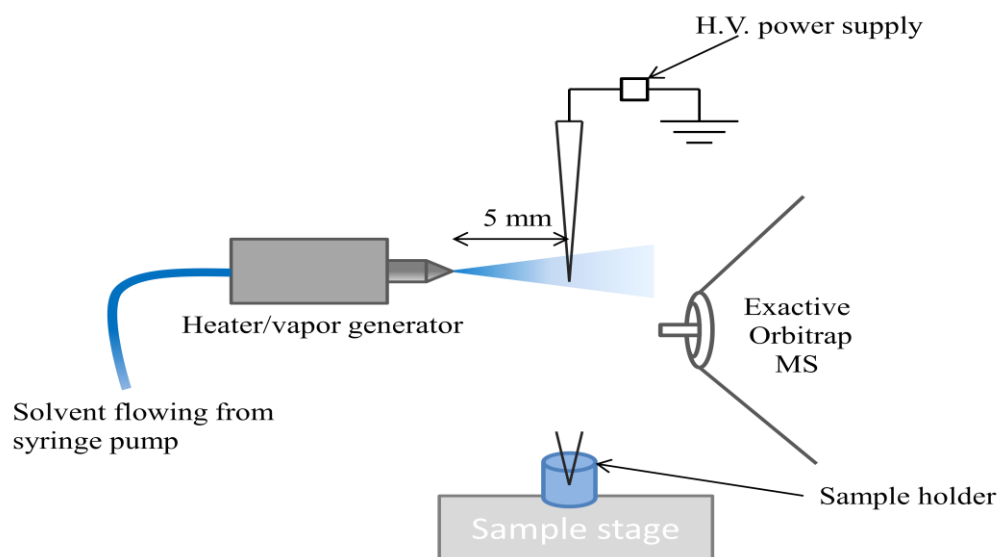

Figure S2. Schematic diagram for experimental set-up of side vapor spray with PESI-MS.
